# Supplementary material
Source: publisher site journal article supplement (https://www.dovepress.com/article/469973)
Supplement: Supplementary file 1 [file get_supplementary_file.php]

**Supplementary Table 1 | The five most frequently published authors within each field**

## Asthma publications

| **Author** | **Institution** | **Number of publications** |
| --- | --- | --- |
| Professor David Price | Observational and Pragmatic Research Institute | 22 |
| Professor Jennifer K Quint | Imperial College London | 19 |
| Professor Sir Aziz Sheikh | University of Edinburgh | 15 |
| Dr Susan Jick | Boston University | 14 |
| Professor Liam Smeeth | London School of Hygiene and Tropical Medicine | 13 |

## COPD publications

| **Author** | **Institution** | **Number of publications** |
| --- | --- | --- |
| Professor Jennifer K Quint | Imperial College London | 41 |
| Professor Liam Smeeth | London School of Hygiene and Tropical Medicine | 21 |
| Professor Pierre Ernst | McGill University | 11 |
| Professor Samy Suissa | McGill University | 11 |
| Dr Chris Compton | GlaxoSmithKline | 9 |

## ILD publications

| **Author** | **Institution** | **Number of publications** |
| --- | --- | --- |
| Professor Richard Hubbard | University of Nottingham | 5 |
| Professor Toby Maher | Imperial College London | 4 |
| C. Smith | University of Nottingham | 4 |
| J. Gribbin | University of Nottingham | 3 |
| Dr Susan Jick | Boston University | 2 |
